# Supplementary material
Source: publisher figshare collection journal article supplement (https://acs.figshare.com/ndownloader/files/3741751)
Supplement: Supplementary file 1 [file 3741751]

# Tailor-made Fluorinated Copolymer/Clay Nanocomposite by Cationic RAFT Assisted Pickering Miniemulsion Polymerization

Arindam Chakrabarty<sup>a</sup>, Longhe Zhang<sup>c,d</sup>, Kevin A. Cavicchi<sup>c</sup>, R.A. Weiss<sup>c</sup>, Nikhil K Singha<sup>a,b\*</sup>

<sup>a</sup> Rubber Technology Centre, Indian Institute of Technology Kharagpur, Kharagpur 721302, India

<sup>b</sup> School of Nano-Science and Technology, Indian Institute of Technology Kharagpur, Kharagpur-721302, India

<sup>c</sup> Department of Polymer Engineering, University of Akron, Akron, OH, 44325-0301, USA.

<sup>d</sup> Present Address: Department of Macromolecular Science and Engineering, Case Western Reserve University, 2100 Adelbert Road, Cleveland, Ohio 44106, USA

\* Correspondence to Nikhil K. Singha; [nks@rtc.iitkgp.ernet.in](mailto:nks@rtc.iitkgp.ernet.in)

## Supporting Information

**Table S1:** Formulation for Pickering miniemulsion polymerization at 75 °C.

| Ingredients     | wt% (w.r.t. monomer) | wt% (w.r.t. total weight) |
|-----------------|----------------------|---------------------------|
| Laponite-RDS    | 20-40                | 2.0-4.8                   |
| DMTTC           | 0.8-2.0              | 0.08-0.2                  |
| Initiator, AAPH | 0.1-0.25             | 0.01-0.025                |
| n-BA            | 60                   | 6.0                       |
| MMA             | 30                   | 3.0                       |
| PFPA            | 10                   | 1.0                       |

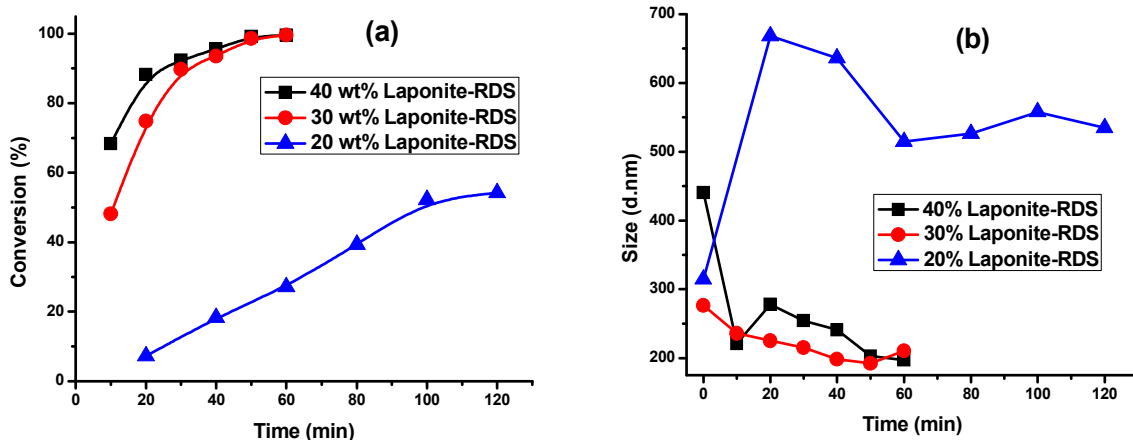

**Figure S1:** Kinetic study of the Pickering miniemulsion polymerization with 1.2 wt% cationic RAFT agent DMTTC and varying amount of laponite-RDS in terms of a) evolution of conversion and b) evolution of particle size w.r.t. time of polymerization.

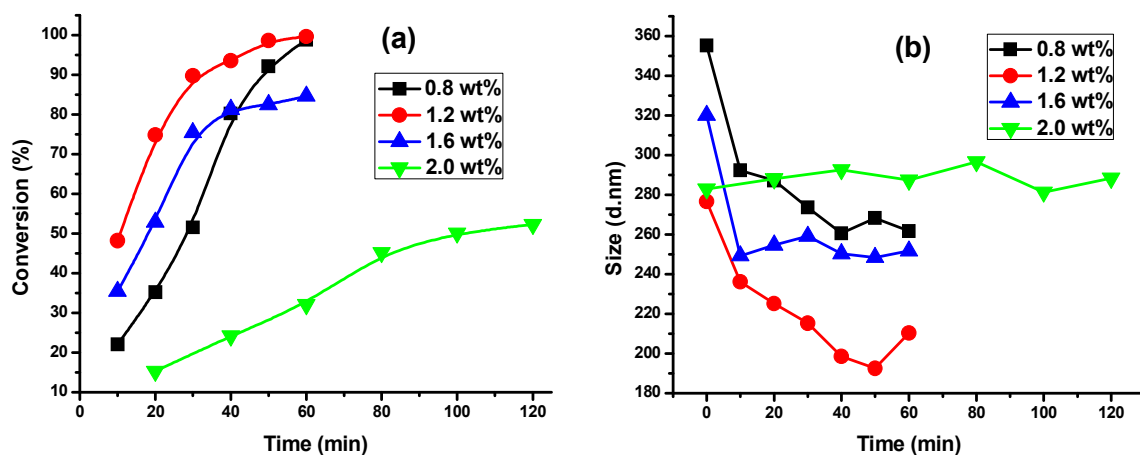

**Figure S2:** Kinetic study of the Pickering miniemulsion polymerization with 30 wt% laponite-RDS and varying amount of cationic RAFT agent in terms of a) evolution of conversion and b) evolution of particle size w.r.t. time of polymerization.

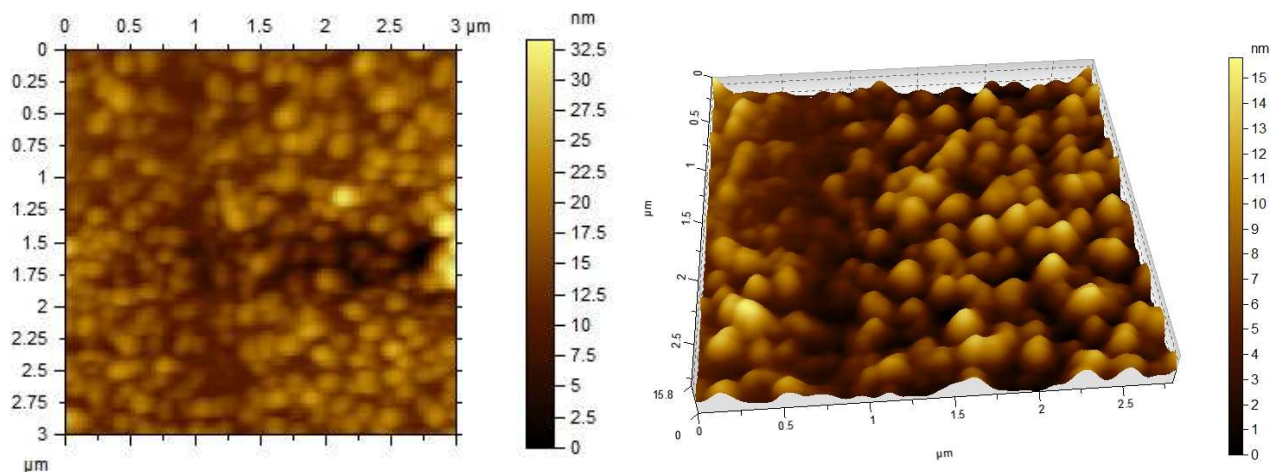

**Figure S3:** AFM images of the fluorinated copolymer prepared by Pickering miniemulsion polymerization with laponite-RDS.

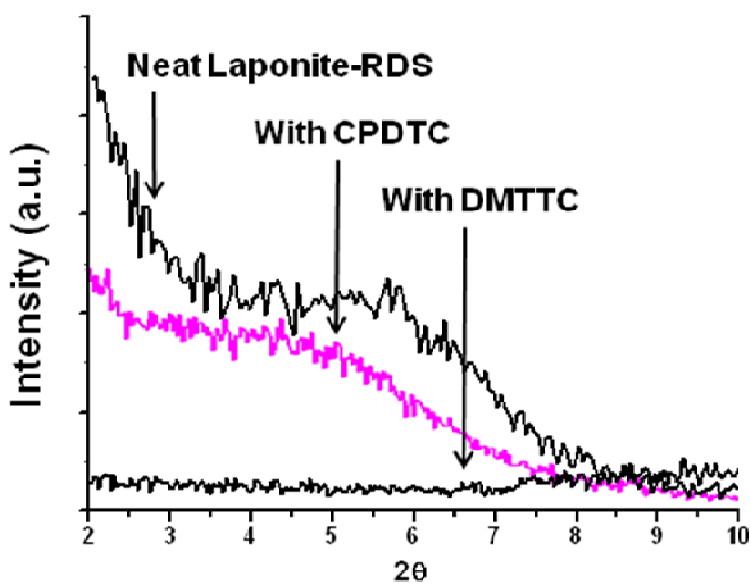

**Figure S4:** XRD profile diagram of neat laponite-RDS and fluorinated copolymer nanocomposites.
